# Supplementary material for: The Sound of Emotion: Pinpointing Emotional Voice Processing Via Frequency Tagging EEG
Source: MDPI journal article supplement (doi:10.3390/brainsci13020162), 2023-01-18
Supplement: s1 [file s1]

## Supplementary

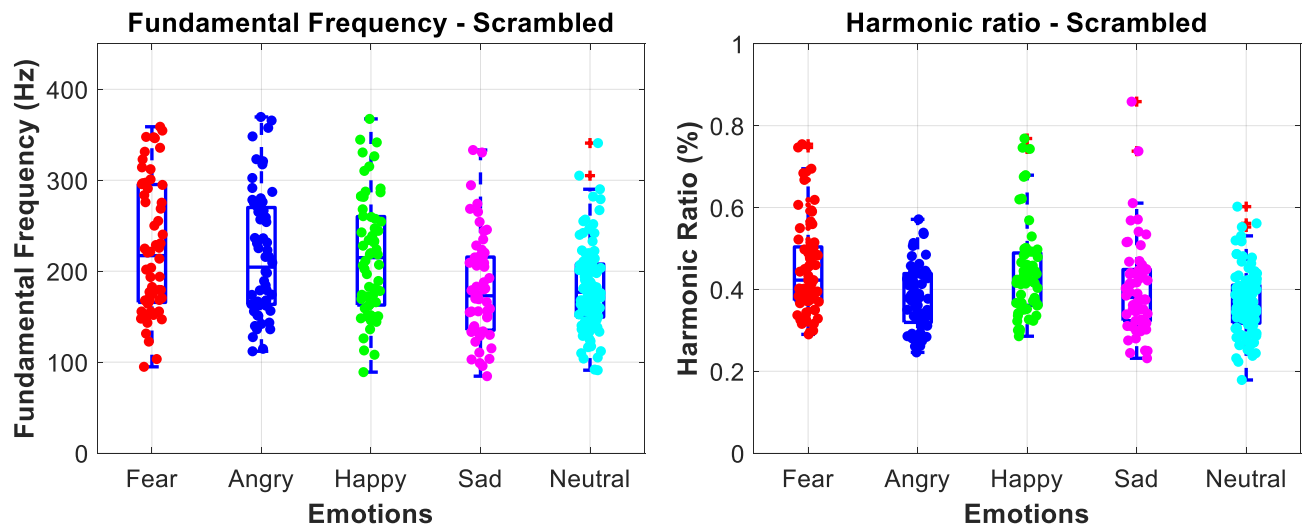

Figure S1. **Low-level features of the vocal utterances.** Low-level features are plotted for every single scrambled stimulus of every emotion condition. On the left the pitch ( $f_0$ , fundamental frequency) is plotted and on the right harmonic ratio (hr in %). Note the large overlap with the original stimuli.
